# Supplementary material for: Graphene oxide self-assembled with a cationic fullerene for high performance pseudo-capacitors
Source: Royal Society of Chemistry journal article supplement (doi:10.1039/c5ta09929c), 2016-01-01
Supplement: c5ta09929c1.pdf [file c5ta09929c1.pdf]

## Supplementary Information

### Graphene oxide self-assembled with cationic fullerene for high performance pseudo-capacitors

Krishnan Senthilkumar,<sup>a</sup> S. J. Richard Prabakar,<sup>a</sup> Chunkuk Park,<sup>a</sup> SeoK Jeong,<sup>b</sup> Myoung Soo Lah<sup>b</sup> and MyoungHo Pyo<sup>\*a</sup>

*<sup>a</sup>Department of Printed Electronics Engineering, Suncheon National University, Suncheon, Chonnam 57922, Republic of Korea.*

*<sup>b</sup>Department of Chemistry, Ulsan National Institute of Science & Technology, Ulsu-gun, Ulsan 44919, Republic of Korea.*

E-mail: mho@sunchon.ac.kr; Fax: +82 61 750 5260; Tel: +82 61 750 3638

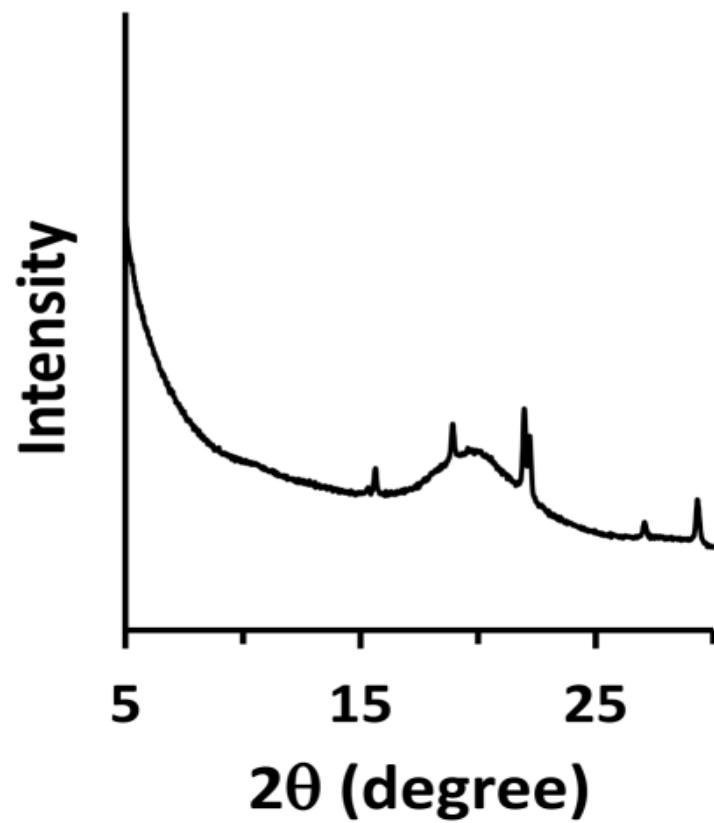

Fig. S1 XRD pattern of CFU.

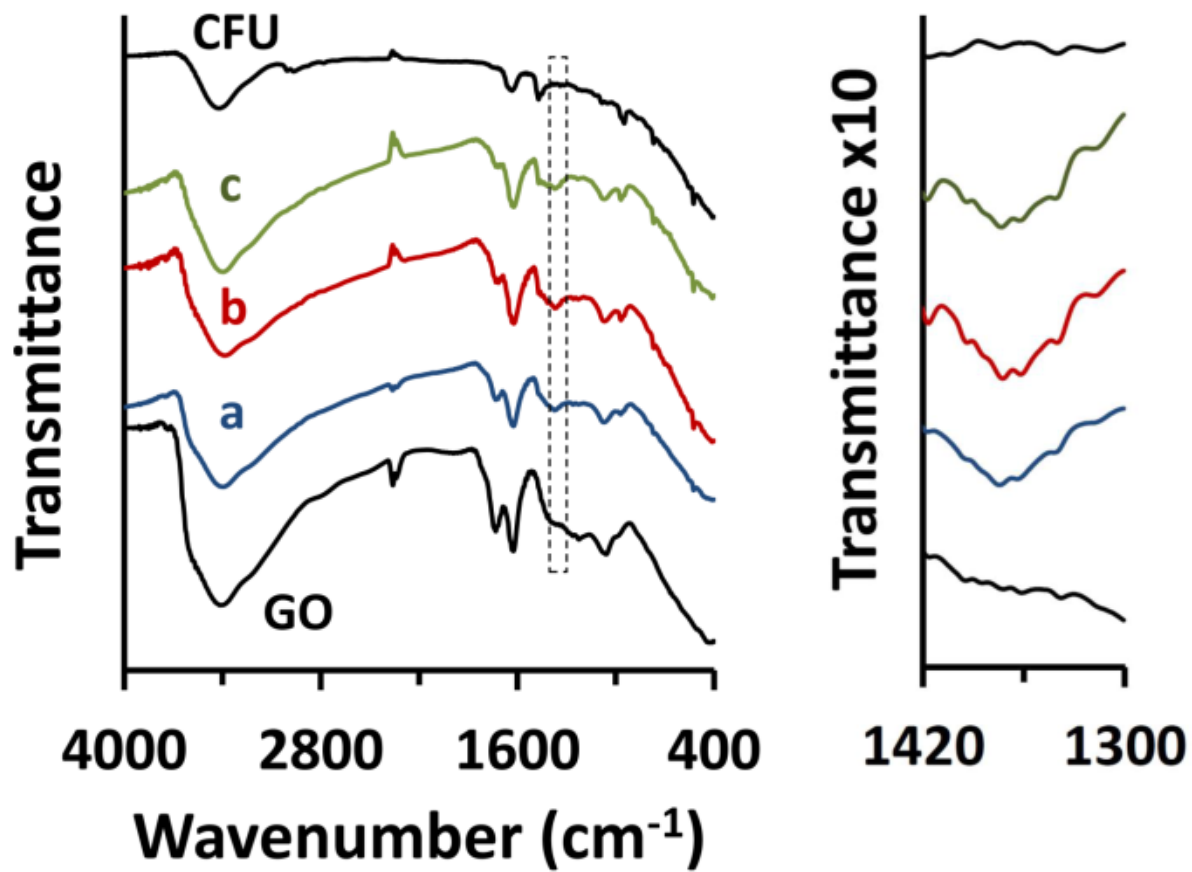

**Fig. S2** (Left panel) FTIR spectra of GO, CFU, (a) GO/CFU(1/0.5), (b) GO/CFU(1/1), and (c) GO/CFU(1/2).

(Right panel) Expanded view of a dotted rectangle on the left panel.

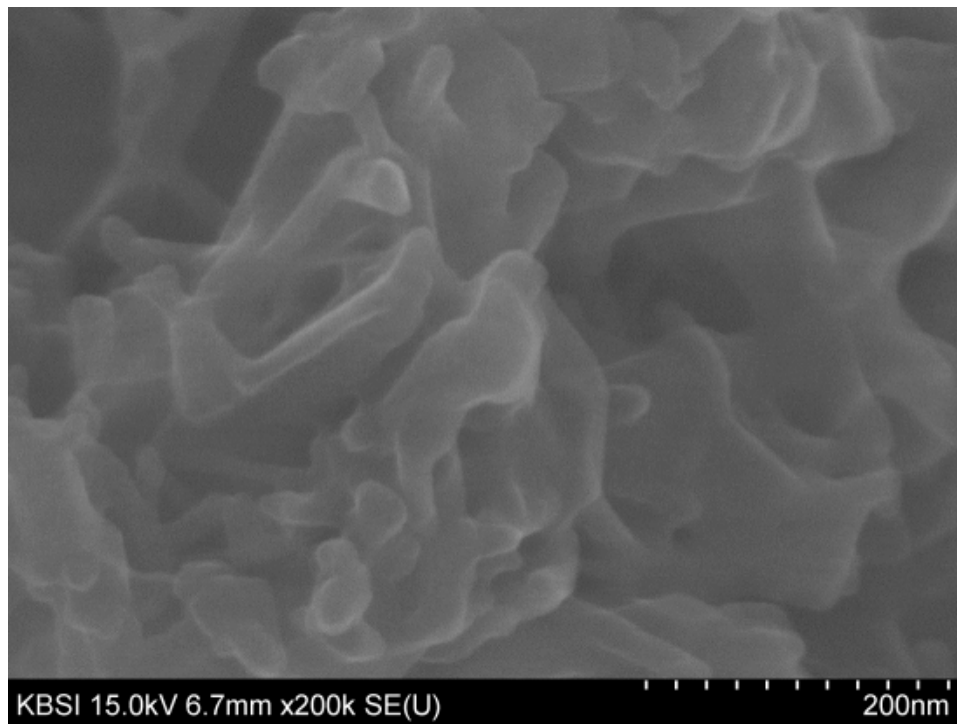

**Fig. S3** FESEM image of CFU

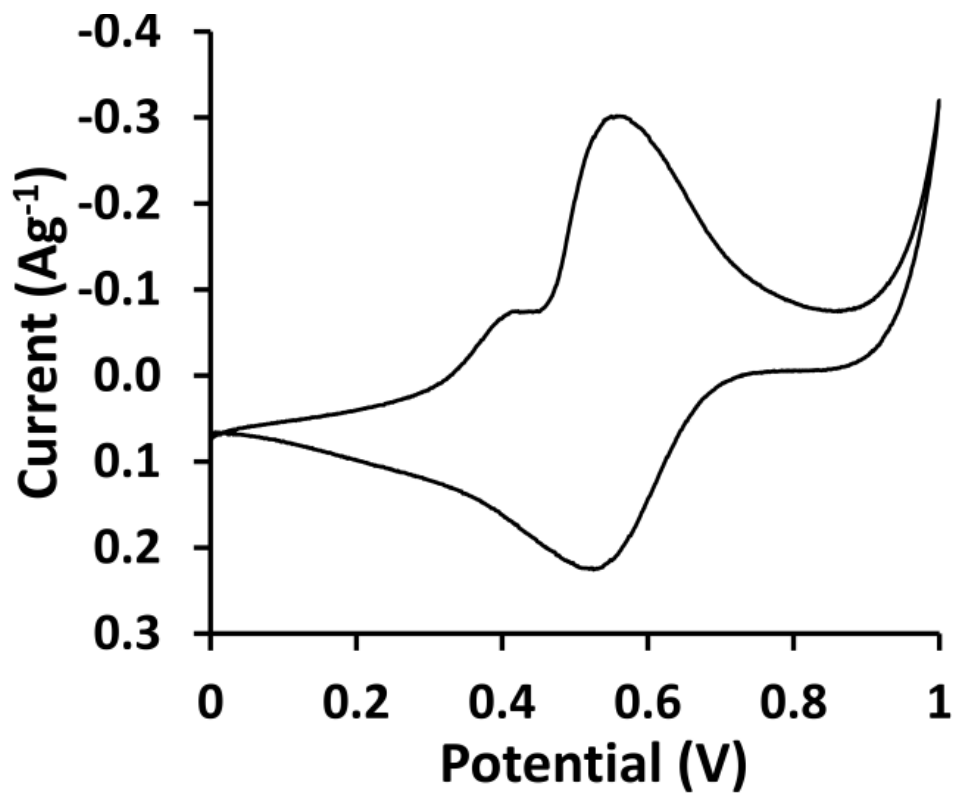

**Fig. S4** Cyclic voltammogram (2<sup>nd</sup> cycle) of CFU in 1.0 M H<sub>2</sub>SO<sub>4</sub> at a scan rate of 5 mVs<sup>-1</sup>. A pair of reversible peaks corresponds to the redox process of iodide counter ions in CFU. When compared with Fig. 7, the current level was also quite low. Note that, due to continuous leaching-out of CFU from the film, steady-state voltammogram could not be obtained.
